# Supplementary material
Source: PubMed Central journal article supplement (PMC2247381)
Supplement: 7401088-s1.pdf [file 7401088-s1.pdf]

## **Supplemental data**

### **Experimental procedures**

#### **Oligonucleotides and plasmids**

The open reading frames (ORF) of SART3, DDX30, DHX36, DDX47, RHA, HuR, hnRNP-C, RBM4, Matrin3, UPF1/RENT1, hnRNP-F, PABP-C1, ZBP1 and ZBP3 were cloned from HeLa Marathon cDNA library (Clontech Inc.). All cDNAs were PCR-amplified using primers that introduce Not1 restriction sites at the 5' end and BamH1 or EcoR1 restriction sites at the 3' end of the ORF. Restricted cDNAs were subsequently ligated into pIRES-VP5 (Meister et al., 2004). For expression of recombinant proteins N-terminal fragments of Ago1, Ago2 or full length TRBP were cloned into pGEX-6P1 (Amersham) using EcoR1 and Xho1 restriction sites. The construction of the human FLAG/HA-Ago1 and FLAG/HA-Ago2 was reported earlier (Meister et al., 2004). miRNA reporter plasmids which express the firefly luciferase orf fused to a regulatory 3'UTR sequence and renilla luciferase as a transfection control were generated from pMIR-REPORT (Ambion) as follows: The renilla luciferase gene including a SV40 promoter and a poly(A) site was PCR-cloned from pRL-SV40 (Promega) into the SspI site of the pMIR-REPORT plasmid. Furthermore, the CMV promoter of the firefly luciferase was replaced by a HSV-TK promoter using PCR amplification from pRL-TK (Promega). A 3'UTR fragment from the KRAS mRNA was PCR-amplified from a published construct (Johnson et al., 2005) and inserted into the SacI and NaeI restriction sites of the reporter plasmid. Alternatively, the HMGA2 3'UTR sequence was PCR amplified from HEK 293 cDNA using oligonucleotides 5' CGCTGAGCTCTACTAATAGTTTGTTGATCTG and 5' CGCTGCCGGCGACCAAACCTTTATTACTCATT and cloned into the described reporter construct via the SacI and NaeI restriction sites. The SERBP1, DNAJB11 and Raver2 reporter constructs have been reported before (Beitzinger et al., 2007). Further, the following DNA oligonucleotides containing a sequence perfectly complementary to miR-21 were annealed, digested with SacI and NaeI and inserted into the SacI and NaeI restriction sites of the

reporter plasmid: 5'  
CGCTGAGCTCATCGCCACCTTGTTTAAGCCTCAACATCAGTCTGATAAGCTAATT  
AGACCTACGCACTCCAGGCCGGCTCGC, 5'  
GCGAGCCGGCCTGGAGTGCGTAGGTCTAATTAGCTTATCAGACTGATGTTGAGGC  
TTAAACAAGGTGGCGATGAGCTCAGCG. The construct carrying a mutated miR-21  
binding site was cloned using the following DNA oligonucleotides: 5'  
CGCTGAGCTCATCGCCACCTTGTTTAAGCCTCAACATCAGCACCATTCTATAATTA  
GACCTACGCACTCCAGGCCGGCTCGC, 5'  
GCGAGCCGGCCTGGAGTGCGTAGGTCTAATTATAGAATGGTGCTGATGTTGAGGC  
TTAAACAAGGTGGCGATGAGCTCAGCG.

The following oligonucleotides were used for detection of KRAS mRNA by qRT-PCR:

ODN1, 5' TTTTAGGACTCTTCTTCCATATTA; ODN2, 5'  
TGGGGCATGTGGAAGGTAGGGAGG. For qPCR validation of siRNA knock downs, the  
following primers were used: 5' CTTGAGGTGGGATGTGTGTG, 5'  
GCAGGAGAGGAAAGGAAAGG (RBM4); 5' AAGTGATGGAGGGTGCTGAC, 5'  
TGCGTCCGTAATTGAAGTTG (YB1); 5' AGTTGTTGTCCCTCGTGACC, 5'  
AGCCTTCTGTTGTTGGTGCT (ZBP3); 5' CACCTCAAAGCGAGCACATA, 5'  
CAATAGCAGTGACCCAGGT (FMRp); 5' TGGTATCGTGGAAGGACTCATGAC,  
5' ATGCCAGTGAGCTTCCCGTTCAGC (GAPDH).

The following siRNAs were used for knock down experiments: RBM4#1:

UUACGGCUUUGUGCACAUAUT, UAUGUGCACAAAGCCGUAAUT; RBM4#2:  
GGAGCUUCGAGCCAAGUUUUT, AAACUUGGCUCGAAGCUCCT; YB1#1:  
AACCUUCGUUGCGAUGACCUT, GGUCAUCGCAACGAAGGUUUT; YB1#2:  
GCAGACCGUAACCAUUAUAUT, UAUA AUGGUUACGGUCUGCUT; YB1#3:  
AGAAGGUCAUCGCAACGAAUT, UUCGUUGCGAUGACCUUCUUT; ZBP3#1:  
UCCAGAACGCACUAUUAUAUT, UGUAAUAGUGCGUUCUGGAUT; FMRp#1:

GGCAGCUUGCCUCGAGAUUUT, AAUCUCGAGGCAAGCUGCCUT; FMRp#2:  
CCUCCUGUAGGUUAUAAUAUT, UAUUAUAACCUACAGGAGGUT; FMRp#3:  
GAACGUCUAAGAUCUGUUAUT, UAACAGAUCUUAGACGUUCUT; FMRp#4:  
ACAGGUACUUUGUCUAAGAUT, UCUUAGACAAAGUACCUGUUT; ctrl.:  
UUGUCUUGCAUUCGACUAAUT, UUAGUCGAAUGCAAGACAAUT. The siRNAs  
against TNRC6B and Ago1-4 were described before (Meister et al., 2004).

The following 2'OMe oligoribonucleotides were used: let-7a 2'OMe: 5'-  
AACTATACAACCTACTACCTCAT; BART5 2'OMe: 5'-  
CTATCAAGGAAACAAAACCACTGT. BART5 is a miRNA derived from the Epstein-Barr  
virus and used as a control for unspecific effects caused by the 2'-OMe oligoribonucleotides.

### **Tissue culture and transfection**

HEK 293 cells were grown in Dulbecco's modified Eagle's medium (DMEM) (PAA) supplemented with 10% heat inactivated fetal bovine serum (Biochrom AG), 100 unit/ml penicillin and 100  $\mu$ g/ml streptomycin (Gibco) at 37°C in 5% CO<sub>2</sub> atmosphere. Cells were transfected using calcium phosphate. Approximately 3h prior to transfection cells were plated at 30% confluency. Per 15 cm dish 15  $\mu$ g plasmid DNA was diluted in 1082  $\mu$ l H<sub>2</sub>O and 153  $\mu$ l 2M CaCl<sub>2</sub>. 1250  $\mu$ l 2 $\times$  HEPES-buffered saline (274 mM NaCl, 1.5 mM Na<sub>2</sub>HPO<sub>4</sub>, 54.6 mM HEPES-KOH pH 7.1) were added drop-wise under gentle agitation. The transfection solution was then sprinkled onto the cells and extracts were generated 48 h after transfection. For luciferase assays, HeLa cells were transfected as described below.

### **Mass spectrometry (MS) and protein identification**

After Coomassie Blue staining gel lanes with corresponding glycerol gradient fractions, were cut into pieces of similar size (23 splices), and subjected to in-gel trypsinization (Shevchenko et al., 1996) The extracted peptides were analyzed by liquid chromatography-coupled tandem

MS[LC-MS/MS] on a Q-ToF Ultima mass spectrometer (Waters). MSMS spectra of doubly and triply charged precursors were acquired for max. 3.3 sec (0.1 sec interscan time). The raw data were processed and transformed into a peaklist using MassLynx software 4.0 (Waters) with the following settings: i) Smoothing: smooth window (channels) 3.00, number of smooths 3 using Savitzky Golay algorithm; ii) Centroiding: min. peak width at half high: 4, centroid top, 80 %.

The peak list of fragment spectra was searched against the NCBI non-redundant database (NCBIInr) with a mass accuracy of 0.2 Da for the parent ion (MS) and 0.2 Da for the fragment ions (MS/MS). Mascor was used as search engine. The peptides were constrained to be tryptic with a maximum of 1 missed cleavage. Carbamidomethylation of cysteines was considered as a fixed modification whereas oxidation of methionine residues was considered as a variable modification. The highest scoring peptide from each protein as well as single hit peptides entry has been manually inspected to eliminate any false positives in the data-set.

### **Protein expression and antibody production**

For the production of GST-fusion proteins, plasmids containing fragments of Ago1, Ago2, full length TRBP or full length SART-3 were transformed into E.coli strain BL21(DE3) and grown as over night cultures. GST-tagged proteins were purified using glutathione sepharose according to the manufacturer's instructions (Amersham). For antibody production in rabbits, 200  $\mu$ g of recombinant protein was repeatedly injected into rabbits. After 5 injections, rabbits were euthanized and the final serum was obtained. Lou/C rats were immunized subcutaneously and intraperitoneally with a mixture of Ago1-GST fusion protein (50  $\mu$ g), 5 nmol CPG oligonucleotide (ODN 2006, TIB Molbiol, Berlin, Germany), 500  $\mu$ l PBS and 500  $\mu$ l IFA. After a six-week interval a final boost without adjuvant was given three days before fusion of the rat spleen cells with the murine myeloma cell line P3X63-Ag8.653 (ZIT). Hybridoma supernatants were tested in an ELISA using bacterial extracts from E. coli

expressing either the Ago1 fusion protein or an irrelevant GST fusion protein. Monoclonal antibodies reacting with Ago1-GST fusion protein and not with an irrelevant GST fusion protein were analysed in western blotting. Ago1-4B8 (rat IgG2a) recognized the protein specifically in western blotting and was used for this study. The Ago1-4B8 antibody is commercially available from Ascenion (<http://www.ascenion.de/>).

### **Western blotting**

For Western blotting, gradient fractions were separated by 10% SDS-PAGE and transferred to a nitrocellulose membrane (Amersham-Biosciences) by semi-dry electroblotting. The following primary antibodies were used: anti-HA (Upstate), anti-hnRNP-U, hnRNP-C1/2, anti-DDX5, anti-YB-1 (all from Abcam), anti-NF-90, anti-NF-45, anti-rpS6 (Cell signaling tech.), DDB1 (Serotec), anti-ZBP-1, anti-ZBP-3, anti-SART3 (see main text), anti-TRBP (see main text) anti-Ago1 (see main text) and anti-Ago2 (Upstate and see above). As secondary antibody, peroxidase-conjugated anti-mouse (Sigma), anti-goat (Abcam), anti-rat (Jackson labs) and anti-rabbit (Sigma) antibodies were used.

### **RT-PCR**

For detection of miRNA association with Ago complexes, lysates from cells transfected with FLAG/HA-tagged Ago1 or Ago2 were separated on sucrose gradients as described. Ago complexes were immunoprecipitated from single fractions using FLAG beads. RNA was isolated and reverse transcription and semi-quantitative PCR was performed using mirVana qRT-PCR miRNA Detection Kit (Ambion) and miRVana qRT-PCR Primer Sets for the miRNAs let-7a and miRNA-16 (Ambion).

For qRT-PCR experiments a reporter construct containing the KRAS 3' UTR (Johnson et al., 2005) was transfected together with FLAG/HA-Ago1 into HEK 293 cells. Lysates were separated by gradient centrifugation and total RNA was extracted from each individual

fraction using phenol/chloroform. Extracted RNA was incubated with 1U DNaseI (Fermentas) and 20U RNasin (Promega) in 1x DNaseI buffer (Fermentas) for 30 min at 37°C followed by enzyme inactivation for 10 min at 70°C. Reverse transcription was performed using a first strand cDNA synthesis kit (Fermentas) according to manufacturer's instructions. The PCR reaction consisted of 2 µl cDNA, 5 nmol primer each and 1x LightCycler 480 SYBR Green I Master buffer (Roche). After initial activation (95°C, 10 min), the target sequence was amplified in 40 PCR cycles (95°C, 15 s; 55°C, 15 s; 72°C, 30 s). PCR Products were tested for specificity by melting point analysis. Quantification was carried out using the LightCycler 480 Basis Software (Roche).

For siRNA knockdown validation, HeLa cells were transfected with siRNAs using the conditions that were employed for the reporter assays. After 5d, total RNA was isolated using the PrepEase Kit (USB corporation, Cleveland, USA). Reverse transcription was performed with random hexamer primers using a first strand cDNA synthesis kit (Fermentas) according to manufacturer's instructions. qPCR was carried out using 500 nM primer each and 1x iQ SYBR Green supermix (Biorad). After initial activation (95°C, 3 min), the target sequence was amplified in 40 PCR cycles (95°C, 10 s; 55°C, 30 s) on a MYiQ (Biorad). Data were evaluated using the iQ5 software (Biorad). The levels of specific mRNAs were normalized to corresponding levels of GAPDH mRNA.

### **RNA cleavage experiments**

In vitro transcribed cleavage substrates used in this study were described previously in (Landthaler et al., 2004; Meister et al., 2004). For RISC activity assays, the miR-19b substrate was <sup>32</sup>P-cap labeled as described (Martinez et al., 2002) and 10 µl of Ago complex-containing anti-FLAG beads were incubated in a 25 µl reaction containing 5 nM target RNA, 1 mM ATP, 0.2 mM GTP, 10 U/mL RNasin (Promega), 100 mM KCl, 1.5 mM MgCl<sub>2</sub> and 0.5 mM DTT for 1.5 h at 30°C. The reaction was stopped by adding 200 µl proteinase K buffer

followed by proteinase K treatment (0.2 mg/ml). RNA was isolated with Phenol/Chloroform and analysed by 8% denaturing RNA PAGE. Signals were detected by autoradiography. For Dicer activity assays, 10  $\mu$ l of Ago complex-containing anti-FLAG beads were incubated in 20  $\mu$ l phosphate buffered saline (PBS) containing 5 mM ATP, 7.5 mM MgCl<sub>2</sub>, 10 U/ml RNasin (Promega) and about 100 counts of internally labeled Dicer for 1 h at 37°C. Beads were treated as described above, and the RNA products were analyzed on a 15% denaturing RNA gel. Radioactive signals were detected as described above.

### **Northern Blotting**

For Northern Blotting, HEK 293 cell lysates transfected with FLAG/HA-Ago2 were subjected to FLAG immunoprecipitation and incubated with or without RNase A treatment as described above. Beads were subjected to Proteinase K treatment as described above. RNA was isolated from the beads using Phenol/Chloroform and separated by 15 % denaturing RNA PAGE. Northern Blotting against miR-19b was performed as described before (Lagos-Quintana et al., 2001).

### **Luciferase reporter assays**

HeLa cells were seeded in complete DMEM to 48 well plates 5hrs prior to transfection to give 50% confluency.

siRNAs were transfected at 10mM final concentration using Hiperfect (Qiagen), according to the manufacturer's instructions. After 2d, cells were passaged in a 1:3 ratio and seeded into a 48 well plate. On the following day, medium was changed to OptiMEM (Invitrogen). Cells were subsequently transfected with reporter plasmids using 0.5  $\mu$ l/well Lipofectamine (Invitrogen) and 0.125  $\mu$ g/well plasmid, according to the manufacturer's instructions. 24hrs later, lipofection complexes were removed and complete DMEM was added. Cells were lysed 1d later in 50  $\mu$ l/well passive lysis buffer (Promega). Luminescence was measured in a

Mithras LB 940 luminometer (Berthold Technologies, Bad Wildbad, Germany), using firefly luciferase buffer (470  $\mu$ M D-luciferin, 530  $\mu$ M ATP, 270  $\mu$ M coenzyme A, 33.3 mM DTT, 20 mM Tricine, 5.34 mM magnesium sulfate, 0.1 mM EDTA; pH adjusted to 7.8) and renilla luciferase buffer (1.43  $\mu$ M Coelenterazine, 2.2 mM EDTA, 0.22 M potassium phosphate, 0.44 mg/ml BSA, 1.1 M NaCl, 1.3 mM NaN<sub>3</sub>; pH adjusted to 5.0). Luciferase substrates were purchased from PJK cryosystems (Kleinblittersdorf, Germany). All samples were assayed in 4-6 replicates. For each siRNA, the firefly/renilla luminescence ratios of the miRNA reporter plasmids were normalized to the corresponding ratio of the empty reporter vector.

For miRNA inhibition experiments 40 pmol of the 2'-O-methyl oligoribonucleotides were pre-transfected into HeLa cells using EscortV (Sigma), according to the manufacturer's instructions. After 6hrs, the medium on the cells was exchanged and cells were transfected with reporter plasmids (0.1  $\mu$ g DNA/well) using 1  $\mu$ l/well EscortV (Sigma), according to the manufacturer's instructions. Cells were lysed 24hrs later in 50  $\mu$ l/well passive lysis buffer (Promega) and luminescence was measured as described above. The firefly/renilla luminescence ratios of the miRNA reporter plasmids were normalized to the corresponding ratio of the empty reporter vector.

For over-expression experiments, cells were co-transfected with reporter plasmids (0.1  $\mu$ g DNA/well) and FLAG/HA-tagged constructs as indicated using 1  $\mu$ l/well EscortV (Sigma), according to the manufacturer's instructions. After 36 h, cells were lysed in 50  $\mu$ l/well passive lysis buffer (Promega) and luminescence was measured as described above. Again, results were normalized to those of the empty vector.

### **Supplemental references**

Beitzinger, M., Peters, L., Zhu, J.Y., Kremmer, E. and Meister, G. (2007) Identification of Human microRNA Targets From Isolated Argonaute Protein Complexes. *RNA Biol*, **4**.



- Johnson, S.M., Grosshans, H., Shingara, J., Byrom, M., Jarvis, R., Cheng, A., Labourier, E., Reinert, K.L., Brown, D. and Slack, F.J. (2005) RAS is regulated by the let-7 microRNA family. *Cell*, **120**, 635-647.
- Lagos-Quintana, M., Rauhut, R., Lendeckel, W. and Tuschl, T. (2001) Identification of novel genes coding for small expressed RNAs. *Science*, **294**, 853-858.
- Landthaler, M., Yalcin, A. and Tuschl, T. (2004) The human DiGeorge syndrome critical region gene 8 and Its D. melanogaster homolog are required for miRNA biogenesis. *Curr Biol*, **14**, 2162-2167.
- Martinez, J., Patkaniowska, A., Urlaub, H., Lührmann, R. and Tuschl, T. (2002) Single-stranded antisense siRNAs guide target RNA cleavage in RNAi. *Cell*, **110**, 563-574.
- Meister, G., Landthaler, M., Patkaniowska, A., Dorsett, Y., Teng, G. and Tuschl, T. (2004) Human Argonaute2 Mediates RNA Cleavage Targeted by miRNAs and siRNAs. *Mol Cell*, **15**, 185-197.
- Shevchenko, A., Jensen, O.N., Podtelejnikov, A.V., Sagliocco, F., Wilm, M., Vorm, O., Mortensen, P., Shevchenko, A., Boucherie, H. and Mann, M. (1996) Linking genome and proteome by mass spectrometry: large-scale identification of yeast proteins from two dimensional gels. *Proc Natl Acad Sci U S A*, **93**, 14440-14445.

### **Supplementary Figure legends**

Supplementary Figure 1. Proteomic analysis of Ago complexes I, II and III. HEK 293 cells were transfected with FLAG/HA-Ago1 or FLAG/HA-Ago2. Lysates were separated by sucrose gradient centrifugation. Fractions 3-8 (complex I), 11-13 (complex II) and 15-17 (complex III) were pooled and subjected to immunoprecipitation using anti-FLAG antibodies. Immunoprecipitated FLAG/HA-Ago1 complexes (lanes 2, 4 and 6) or FLAG/HA-Ago2 complexes (lanes 8, 10 and 12) were separated by SDS PAGE and the proteins were analyzed

by ESI TOF mass spectrometry. Lanes 1, 3, 5, 7, 9 and 11 show molecular weight markers. IgG as well as FLAG/HA-Ago1 and -Ago2 bands are indicated.

Supplementary Figure 2. Proteomic analysis of control samples. Lysates from HEK 293 cells transfected with FLAG/HA-Ago2 were separated by gradient centrifugation and fractions were pooled as in S1. Immunoprecipitation using agarose coupled mouse IgG and proteomic analysis were performed as described in S1. Lanes 2, 4 and 6 show immunoprecipitates from Ago complexes I, II and III, respectively, obtained with control antibody. IgG bands are denoted to the right, lanes 1, 3, 5 and 7 show molecular weight markers.

Supplementary Figure 3. Efficiency test of RNase treatment. (A) Total RNA from HEK 293 cells was incubated with (+) or without (-) RNase A, separated by RNA PAGE and stained with ethidium bromide. (B) Lysates from HEK 293 cells transfected with FLAG/HA-Ago2 were subjected to immunoprecipitation using FLAG beads. Beads were incubated with or without RNase A. Northern Blot against miR-19b was performed with RNA isolated from these beads. As a loading control, 15% of the beads were used for Western blotting against the HA-tag.

Supplementary Figure 4. SiRNA validation using qRT-PCR. Total RNA was reverse transcribed and cDNA was amplified by qPCR with primers specific to RBM4 (A), YB1 (B), ZBP3 (C) and FMRp (D). mRNA levels relative to GAPDH mRNA were normalized to control transfections. The error bars are derived from three different transfections.

Supplementary Figure 5. Mutant miR-21 cleavage construct shows no significant difference compared to empty vector. SiRNAs against the indicated proteins were pre-transfected into HeLa cells. After 48hrs, a luciferase reporter containing a mutated binding site for miR-21 or

a control vector lacking the miR-21 binding site were transfected. Luciferase assays were done in triplicates. Results from the mutated reporter construct were normalized to those of the empty vector.

Supplementary Figure 6. Overexpression of RBM4 interferes with miRNA-regulated gene silencing. The indicated amounts of plasmids encoding for RBM4 and ZBP3 (control) were co-transfected into HeLa cells together with the KRAS luciferase reporter plasmid. Luciferase assays were done in triplicates. KRAS data were normalized to those of the empty vector.

**A**

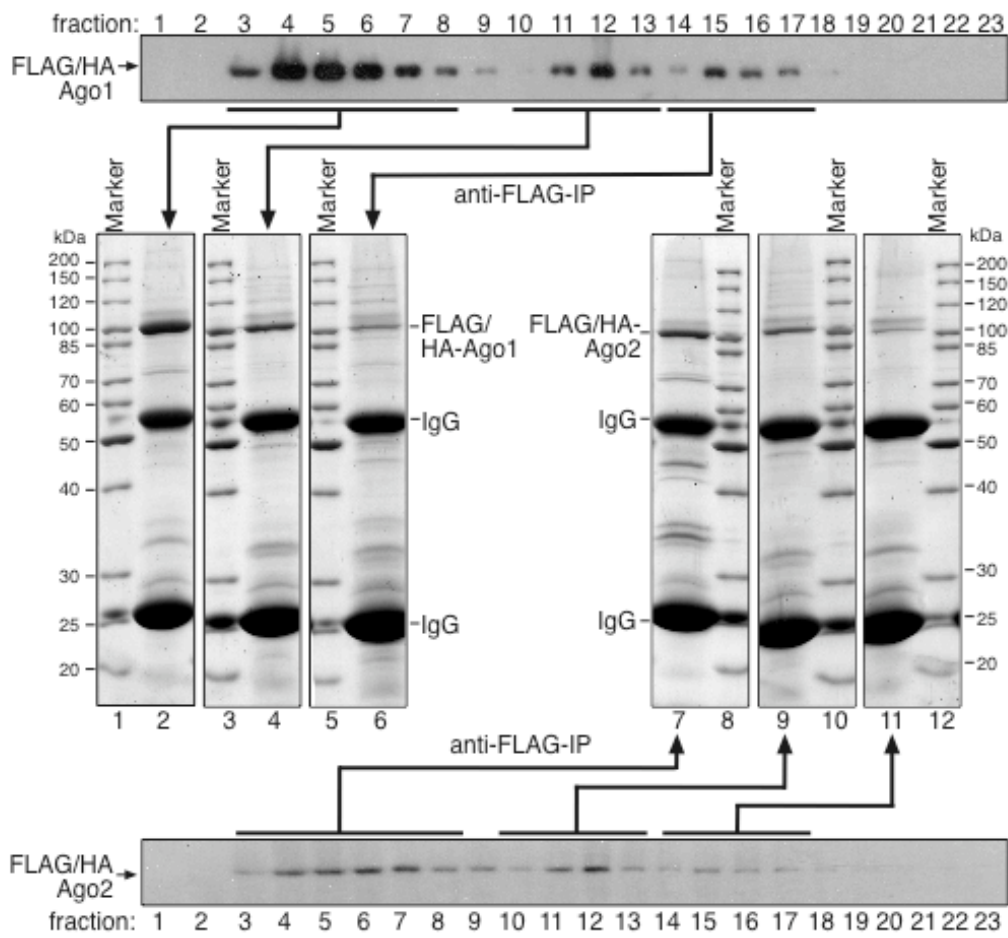

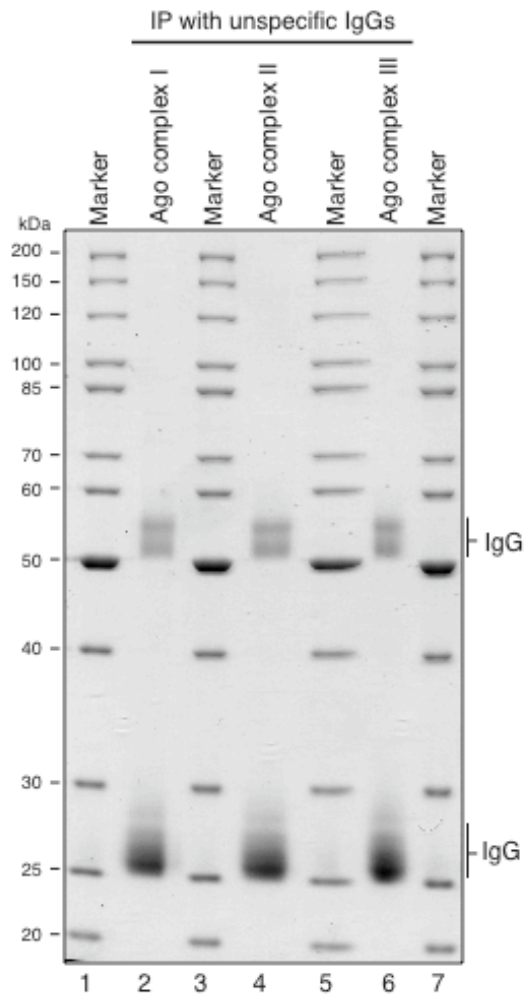

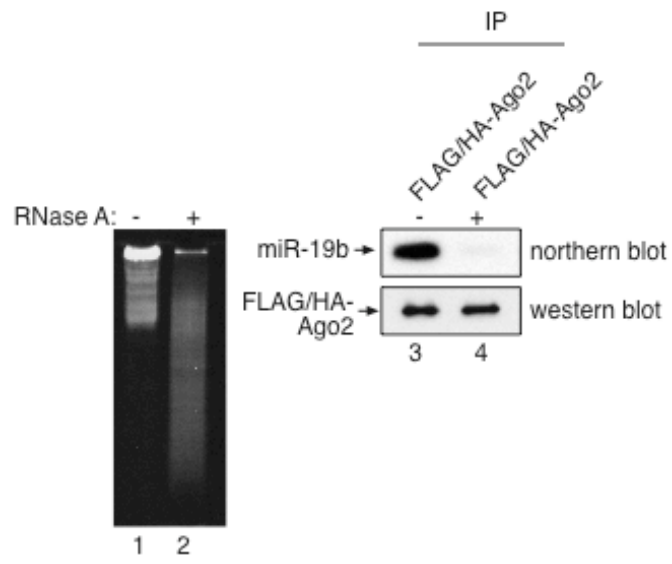

**A**

miR-21 cleavage construct

CGGCCGGACCTCACGCATCCAGATTAATCGAATAGTCTGACTACAACCTCCGAATTTGTTCCACCGCTACTCGAG - 5'  
 5'- TAGCTTATCAGACTGATGTTGA  
 miR-21

mutant cleavage construct

CGGCCGGACCTCACGCATCCAGATTAAT ATCT CCAC  
 5'- TAGCTTATCAGACTGATGTTGA  
 miR-21

**B**

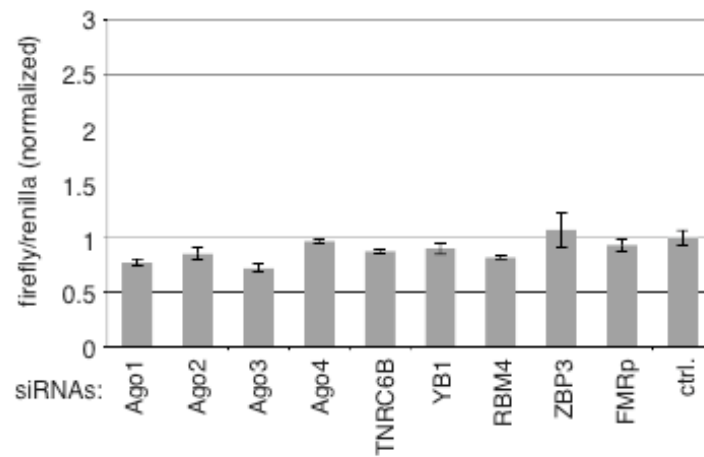

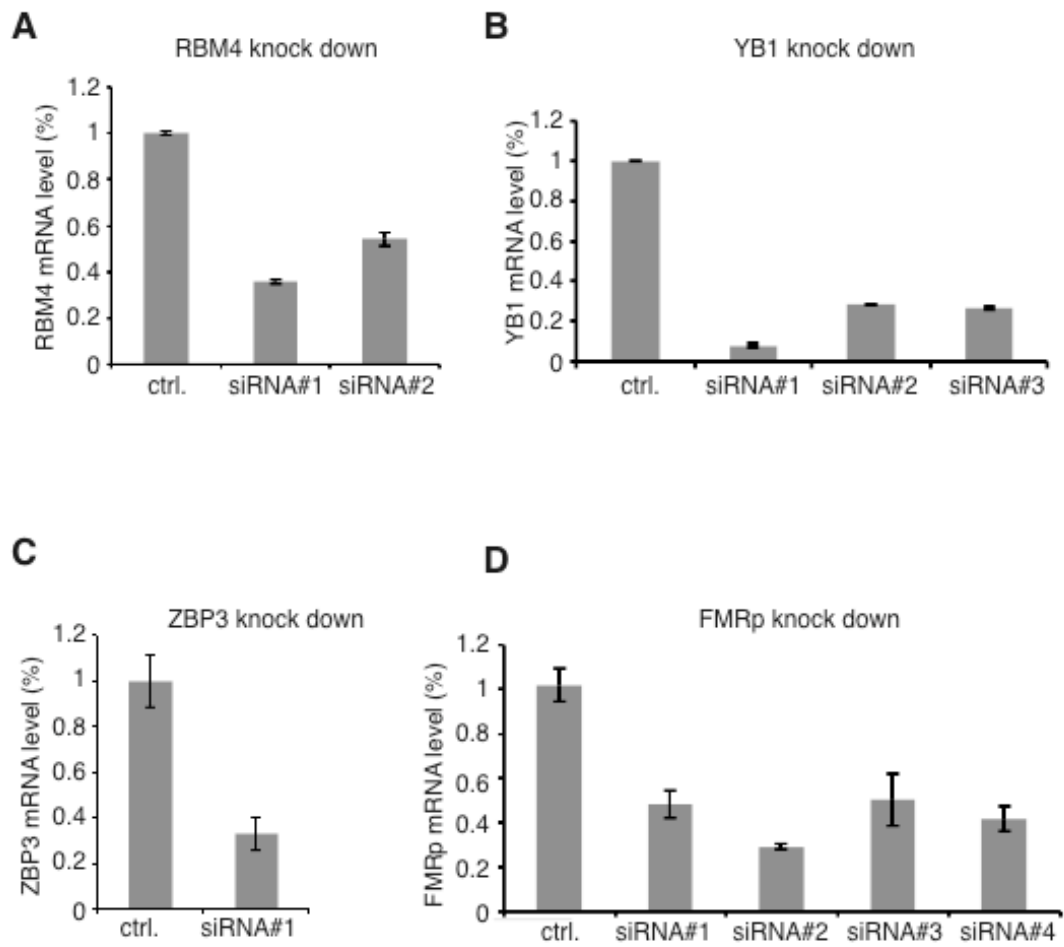



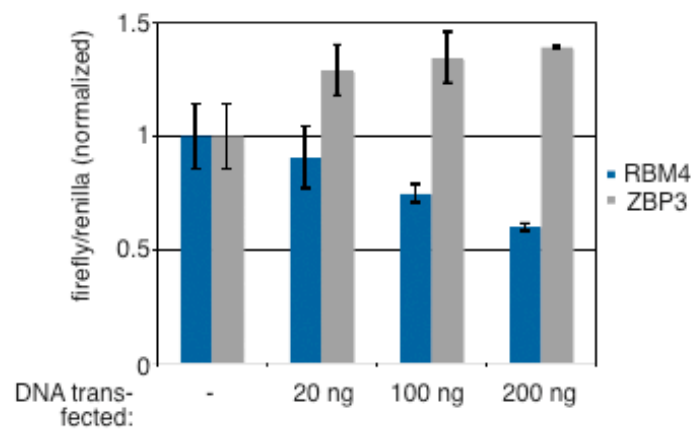

Supplemental table 1: Protein composition of Ago1 complex 1

| protein                                                                                                                                      | Acc.No.     | Mass   | Queries matched | Proteinscore | Seq cov % | Peptidescore | Pep delta     | Pep sequence          |
|----------------------------------------------------------------------------------------------------------------------------------------------|-------------|--------|-----------------|--------------|-----------|--------------|---------------|-----------------------|
| eukaryotic translation initiation factor 2C, 1 (Ago1) [Homo sapiens]                                                                         | gi 6912352  | 97152  | 26              | 2058         | 58        | 87           | -0.0038       | K.NASYNLDPYIQEFGIK.V  |
| Dicer                                                                                                                                        | gi 21665773 | 217490 | 7               | 383          | 5         | 112          | 0.1540        | K.SNAETATDLVLDLR.Y    |
| squamous cell carcinoma antigen recognized by T cells 3 (SART3) [Homo sapiens]                                                               | gi 7961952  | 109865 | 6               | 158          | 6         | 40           | 0.0663        | R.YSQVLDLR.Q          |
| Na <sup>+</sup> /K <sup>+</sup> -ATPase alpha 1 subunit isoform a proprotein [Homo sapiens]                                                  | gi 21361181 | 112824 | 2               | 72           | 1         | 39           | 0.0775        | R.LNIPYSQVNP.R.D      |
| unnamed protein product [Homo sapiens]                                                                                                       | gi 34535987 | 148788 | 1               | 24           | -         | 24           | 0.0190        | K.EPLLHFR.R           |
| DNA damage binding protein 1 (Damage-specific DNA binding protein 1) (DDB p127 subunit) (DDBa) (UV-damaged DNA-binding protein 1) (UV-DDB 1) | gi 418316   | 126901 | 4               | 92           | 3         | 50           | 0.0530        | K.LLASINSTR.L         |
| sirtuin 1 [Homo sapiens]                                                                                                                     | gi 7657575  | 81630  | 1               | 68           | 1         | 68           | 0.0590        | R.GDFNQVVP.R.C        |
| HSPC273 [Homo sapiens]                                                                                                                       | gi 6841196  | 25891  | 1               | 66           | 4         | 66           | 0.0725        | R.ELGENLDQLR.A        |
| E1B-55kDa-associated protein (hnRNP U-like) [Homo sapiens]                                                                                   | gi 3319956  | 95750  | 1               | 48           | 0         | 48           | 0.0579        | K.INEEISVK.H          |
| programmed cell death 1 precursor [Homo sapiens]                                                                                             | gi 4826890  | 31687  | 1               | 20           | 2         | 20           | 0.0633        | R.RTGQPLK.E           |
| heat shock 90kDa protein [Homo sapiens]                                                                                                      | gi 56204416 | 83212  | 12              | 686          | 24        | 61           | 0.0464        | K.SIYYITGESK.E        |
| Skb1/Its (PRMT5) [Homo sapiens]                                                                                                              | gi 48145599 | 72636  | 12              | 749          | 25        | 75           | 0.0108        | K.AALPTSIFLTK.K       |
| aralar2 [Homo sapiens]                                                                                                                       | gi 6523256  | 74093  | 3               | 115          | 6         | 86           | 0.0492        | K.TVELLSGVVDQTK.D     |
| chaperonin (HSP60)                                                                                                                           | gi 306890   | 60986  | 7               | 374          | 21        | 55           | 0.0037        | R.VTDALNATR.A         |
| translation initiation factor eIF-2b delta subunit [Homo sapiens]                                                                            | gi 6563202  | 57563  | 1               | 60           | 2         | 60           | 0.0320        | R.VGTALQALVAR.A       |
| elongation factor Tu [Homo sapiens]                                                                                                          | gi 31092    | 50095  | 5               | 194          | 10        | 54           | 0.0206        | K.IGGIGTVPVGR.V       |
| RuvB-like 2 [Homo sapiens]                                                                                                                   | gi 5730023  | 51125  | 2               | 89           | 4         | 47           | 0.0332        | K.GTEVQVDDIKR.V       |
| Dnj3/Cpr3 [Homo sapiens]                                                                                                                     | gi 2352904  | 46277  | 1               | 145          | 10        | 32           | 0.0337        | R.ELYDRYGEQGLR.E      |
| trans-activation-responsive RNA-binding protein - human (TRBP) (fragment)                                                                    | gi 107904   | 38614  | 1               | 36           | 2         | 36           | 0.0358        | R.FIEIGSGTSK.K        |
| KIAA0115 [Homo sapiens]                                                                                                                      | gi 473947   | 50680  | 1               | 31           | 1         | 31           | 0.0317        | K.SSLNPIFR.G          |
| MEP50 protein (MEP50) [Homo sapiens]                                                                                                         | gi 13559060 | 36701  | 5               | 390          | 22        | 93           | 0.0469        | K.VVDLAQQVLLSSYR.A    |
| signal sequence receptor, alpha [Homo sapiens]                                                                                               | gi 4507237  | 32163  | 1               | 44           | 3         | 44           | 0.0306        | K.GEDFPANNIVR.F       |
| solute carrier family 25 member 3 isoform a precursor [Homo sapiens]                                                                         | gi 6031192  | 40069  | 1               | 54           | 3         | 54           | 0.0282        | R.IQTQPGYANTLR.D      |
| S3 ribosomal protein [Homo sapiens]                                                                                                          | gi 7765076  | 26699  | 2               | 206          | 25        | 68           | 0.0322        | R.ELAEDGYSGVEVR.V     |
| solute carrier family 25, member 5 [Homo sapiens]                                                                                            | gi 4502099  | 32874  | 7               | 190          | 22        | 49           | 0.0239        | K.LLLQVGHASK.Q        |
| Solute carrier family 25, member A6 [Homo sapiens]                                                                                           | gi 15928608 | 32905  | 7               | 204          | 22        | 49/48        | 0.0239/0.0088 | R.GNLANVIR.Y          |
| solute carrier family 25 member 4 variant [Homo sapiens]                                                                                     | gi 62089114 | 29328  | 3               | 131          | 11        | 47           | 0.0142        | R.GNLANVIR.Y          |
| transmembrane protein 33 [Homo sapiens]                                                                                                      | gi 8922491  | 27933  | 1               | 56           | 4         | 56           | 0.0113        | R.ALLANALTSALR.L      |
| ribosomal protein L23 [Homo sapiens]                                                                                                         | gi 4506605  | 14856  | 1               | 28           | 5         | 28           | 0.0137        | K.NLIYISVK.G          |
| Ribosomal protein S27-like protein [Homo sapiens]                                                                                            | gi 13277528 | 9472   | 1               | 58           | 9         | 58           | 0.0133        | R.LITEGFSFR.R + Carb. |
| ribosomal protein L38 [Homo sapiens]                                                                                                         | gi 3088356  | 4291   | 1               | 38           | 27        | 38           | 0.0253        | K.QSLPPGLAVK.E        |
| ribosomal protein S6                                                                                                                         | gi 225901   | 28633  | 1               | 28           | 3         | 28           | 0.0224        | K.LIEVDDEK.K          |





Supplemental table 4: Protein composition of Ago2 complex 1

| protein                                                                                                                                               | Acc.No.     | Mass   | Queries matched | Proteinscore | Seq cov % | Peptidescore | Pep delta          | Pep sequence          |
|-------------------------------------------------------------------------------------------------------------------------------------------------------|-------------|--------|-----------------|--------------|-----------|--------------|--------------------|-----------------------|
| eukaryotic initiation factor 2C2 (Ago2) [Homo sapiens]                                                                                                | gi 29171734 | 97146  | 12              | 1104         | 40        | 91           | 0.0204             | R.SVSIPIAPAYIAHLVAFRA |
| solute carrier family 25 member 3 isoform a precursor [Homo sapiens]                                                                                  | gi 6031192  | 40069  | 5               | 217          | 14        | 62           | 0.0382             | R.IQTQPGYANTLR.D      |
| Dicer [Homo sapiens]                                                                                                                                  | gi 5019620  | 218673 | 6               | 353          | 5         | 112          | 0.0632             | K.SNAETATDVLVLDLR.Y   |
| KIAA1093 protein [Homo sapiens]                                                                                                                       | gi 14133235 | 183156 | 3               | 169          | 3         | 74           | 0.0778             | K.TGSIAGSIAAR.G       |
| HsGCN1 [Homo sapiens]                                                                                                                                 | gi 2282576  | 211377 | 1               | 41           | 0         | 41           | 0.0405             | K.ASLLPDPVPEVR.T      |
| Na <sup>+</sup> K <sup>+</sup> ATPase [Homo sapiens]                                                                                                  | gi 1359715  | 111901 | 1               | 122          | 3         | 47           | 0.0305             | R.LNIPVSOVNFPR.D      |
| RNA-binding protein 10 [RNA-binding motif protein 10] (DXS8237E)                                                                                      | gi 12644371 | 103396 | 1               | 40           | 1         | 40           | 0.0326             | R.DGLGSDNIGSR.M       |
| HSPC273 [Homo sapiens]                                                                                                                                | gi 8641186  | 25891  | 1               | 95           | 10        | 74           | 0.1177             | R.ELLENDQLR.A         |
| importin 4 [Homo sapiens]                                                                                                                             | gi 18700635 | 188642 | 1               | 70           | 1         | 41           | 0.0812             | R.ELLFLPTEK.I         |
| DNA damage binding protein 1 (Damage-specific DNA binding protein 1) (DDB p127 subunit) (DDBa) (UV-damaged DNA-binding protein 1) (UV-DDB 1)          | gi 418316   | 126901 | 1               | 31           | 2         | 24           | 0.1030             | K.VTLGTQPTVLR.T       |
| importin 8 [Homo sapiens]                                                                                                                             | gi 53759103 | 119861 | 1               | 30           | 0         | 30           | 0.1061             | K.IINPAPLLR.I         |
| eukaryotic translation initiation factor 2C, 3 (Ago3) [Homo sapiens]                                                                                  | gi 5620478  | 71165  | 12              | 1104         | 26        | 91           | 0.0204             | R.SVSIPIAPAYIAHLVAFRA |
| Heat shock protein 90 [Homo sapiens]                                                                                                                  | gi 56204416 | 83212  | 8               | 520          | 13        | 81           | 0.0209             | R.GVVDSDELPLNISR.E    |
| PREDICTED: similar to liver phosphofructokinase isoform b; 6-phosphofructokinase, liver type, liver-type 1-phosphofructokinase, phosphofructokinase 1 | gi 55657570 | 85437  | 1               | 53           | -         | 48           | 0.0934             | R.FDEATQLR.G          |
| initiation factor 4B [Homo sapiens]                                                                                                                   | gi 288100   | 69183  | 1               | 32           | 2         | 32           | 0.1246             | R.AASIFGGAKPVDTAAR.E  |
| MTHSP75                                                                                                                                               | gi 292059   | 73734  | 2               | 25           | 6         | 33           | 0.0469             | R.QAVTNPNNTFYATKR.L   |
| Skb [Hs] [Homo sapiens]                                                                                                                               | gi 82581643 | 72520  | 10              | 710          | 25        | 66           | 0.1128             | K.YSQYQQAIIYK.C       |
| aralaz2 [Homo sapiens]                                                                                                                                | gi 523256   | 74093  | 2               | 100          | 2         | 61           | 0.1153             | R.LQIAGETITGPR.V      |
| proteasome subunit p58 [Homo sapiens]                                                                                                                 | gi 2656092  | 60968  | 1               | 44           | 2         | 44           | 0.0964             | R.VYFELDKLDVLR.S      |
| glycoprotein-associated amino acid transporter hb0,+AT1 [Homo sapiens]                                                                                | gi 5823978  | 53436  | 1               | 32           | 1         | 32           | 0.0358             | K.VLSIYVRR.L          |
| Chaperonin [Homo sapiens]                                                                                                                             | gi 49522865 | 61016  | 5               | 348          | 10        | 79           | 0.0927             | K.NAGVEGSLVKE.I       |
| mitogen-activated protein kinase kinase kinase 7 interacting protein 1 isoform alpha [Homo sapiens]                                                   | gi 5174703  | 54510  | 1               | 64           | 2         | 64           | 0.1068             | K.YGYTIDILSAAK.S      |
| TATA binding protein interacting protein 49 kDa [Homo sapiens]                                                                                        | gi 4506753  | 50196  | 1               | 61           | 2         | 61           | 0.0746             | K.QAASGLVQGENAR.E     |
| elongation factor Tu                                                                                                                                  | gi 556301   | 4      | 196             | 10           | 65        | 0.0505       | K.THNIVVIGHVDSGK.S |                       |
| RuvB-like 2 [Homo sapiens]                                                                                                                            | gi 5730023  | 51125  | 2               | 140          | 4         | 82           | 0.0451             | R.SGLDGLLEPR.R        |
| trans-activation-responsive RNA-binding protein - human (TRBP) (fragment)                                                                             | gi 107904   | 38914  | 1               | 46           | 2         | 46           | 0.0250             | R.FIEIGSGTSK.K        |
| unnamed protein product [Homo sapiens]                                                                                                                | gi 31092    | 50095  | 3               | 88           | 6         | 39           | 0.0260             | K.IGIGITVPVGR.V       |
| HNRPF protein [Homo sapiens]                                                                                                                          | gi 16876910 | 45671  | 1               | 64           | 4         | 51           | 0.0328             | R.VIEVFKSSQEEVRS.S    |
| 26S proteasome regulatory chain 4 [validated] - human                                                                                                 | gi 345717   | 49210  | 1               | 46           | -         | 46           | 0.0247             | K.OVLYGPPSTGK.T       |
| MEP50 protein (MEP50) [Homo sapiens]                                                                                                                  | gi 13559060 | 36701  | 4               | 343          | 21        | 89           | 0.0813             | K.VWDLAQVQLSSYR.A     |
| brain tumor associated protein LRR4 [Homo sapiens]                                                                                                    | gi 14495561 | 72871  | 1               | 47           | 1         | 47           | 0.0122             | R.MAEKCR.T            |
| otopetrin 2 [Homo sapiens]                                                                                                                            | gi 30039714 | 62195  | 1               | 43           | 1         | 43           | 0.0444             | R.EAWAIVSIPR.S        |
| Cl channel                                                                                                                                            | gi 228672   | 25672  | 1               | 92           | 5         | 92           | 0.0186             | K.SLGTGLVIAEIR.L      |
| 7-dehydrocholesterol reductase [Homo sapiens]                                                                                                         | gi 3171089  | 53073  | 1               | 38           | 1         | 38           | 0.0129             | R.YTAAVPIR.L          |
| oxidase (cytochrome c) assembly 1-like [Homo sapiens]                                                                                                 | gi 4826880  | 55262  | 1               | 37           | 1         | 37           | 0.0062             | R.NQLEAAR.G           |
| [Human pre-mRNA splicing factor SF2p32, complete sequence], gene product                                                                              | gi 338043   | 30888  | 4               | 469          | 33        | 81           | 0.0706             | R.VSFQGTGESEVW.K      |
| emeirin [Homo sapiens]                                                                                                                                | gi 4557553  | 28976  | 1               | 40           | 3         | 40           | 0.0357             | R.AFGAGLGGQR.Q        |
| Solute carrier family 25, member A6 [Homo sapiens]                                                                                                    | gi 15928608 | 32905  | 12              | 420          | 33        | 66           | 0.0461             | K.LLLQGVHASK.Q        |
| solute carrier family 25, member 5 [Homo sapiens]                                                                                                     | gi 4502099  | 32874  | 11              | 362          | 32        | 71           | 0.0513             | K.DFLAGVHAASK.T       |
| transmembrane protein 33 [Homo sapiens]                                                                                                               | gi 8922491  | 27933  | 2               | 90           | 8         | 60           | 0.0839             | R.ALLANALTSALR.L      |
| ADP-ATP translocase                                                                                                                                   | gi 339721   | 28042  | 1               | 25           | 4         | 25           | 0.0780             | R.AAIFYGIYDAK.G       |
| signal sequence receptor, delta [Homo sapiens]                                                                                                        | gi 5454000  | 18887  | 1               | 87           | 13        | 44           | 0.0744             | R.FFEESYSLR.K         |
| ribosomal protein S20 [Homo sapiens]                                                                                                                  | gi 3088340  | 6853   | 1               | 38           | 20        | 38           | 0.0502             | R.LIHLSPSEVQ.K        |
| ribosomal protein L23 [Homo sapiens]                                                                                                                  | gi 4509605  | 14856  | 2               | 86           | 20        | 35           | 0.0407             | K.GSAITGPVAK.E        |
| NADH dehydrogenase (ubiquinone) 1 alpha subcomplex, 4, 9kDa [Homo sapiens]                                                                            | gi 75517917 | 9394   | 2               | 52           | 22        | 37           | 0.0467             | K.FFSVNWVYSK.L        |
| ribosomal protein S27 [Homo sapiens]                                                                                                                  | gi 4432748  | 7886   | 1               | 49           | 17        | 49           | 0.0437             | -DLLAPSPREEKR.K       |
| ribosomal protein L38 [Homo sapiens]                                                                                                                  | gi 3088356  | 4291   | 1               | 29           | 29        | 29           | 0.0371             | K.OSLPPPLAVK.E        |
| c-myc binding protein [Homo sapiens]                                                                                                                  | gi 1785851  | 11945  | 1               | 24           | 10        | 24           | 0.0610             | K.LAQYEPQEEK.R        |
